# Supplementary material for: A Rapid and Sensitive Aptamer-Based Biosensor for Amnesic Shellfish Toxin Domoic Acid
Source: MDPI journal article supplement (doi:10.3390/bioengineering9110684), 2022-11-11
Supplement: s1 [file s1]

## **Supplementary Materials**

### **A rapid and sensitive aptamer-based biosensor for amnesic shellfish toxin domoic acid**

Luming Zhao <sup>1,†</sup>, Han Guo <sup>1,†</sup>, Han Chen <sup>1,†</sup>, Bin Zou <sup>1</sup>, Chengfang Yang <sup>1</sup>, Xiaojuan Zhang <sup>2</sup>, Yun Gao <sup>1</sup>, Mingjuan Sun <sup>1,\*</sup> and Lianghua Wang <sup>1,\*</sup>

<sup>1</sup> Department of Biochemistry and Molecular Biology, College of Basic Medical Sciences, Naval Medical University, Shanghai 200433, China

<sup>2</sup> College of Medicine, Shaoxing University, 900th Chengnan Avenue, Shaoxing 312000, China

\* Correspondence: sunmj@smmu.edu.cn (M.S.); lhwang@smmu.edu.cn (L.W.)

† These authors contributed equally to this work.

## 1. Analysis Software and Methods

### 1.1. Sequence Analysis of Aptamers

Sequences from high throughput sequencing and cloning sequencing were analyzed by Clustal X 2.1 for multiple sequence alignment. Sequences were clustered and divided into several families.

The secondary structure and Gibbs free energy of candidate aptamers were predicted by the web server of mfold (<http://www.unafold.org/mfold/applications/dna-folding-form.php>). The folding temperature was set to 25 °C, and the concentrations of Na<sup>+</sup> and Mg<sup>2+</sup> were set to 177.7 mM and 0.492 mM, respectively. Other parameters were set to be the default in mfold.

### 1.2. 3D Structure Modeling of Aptamer

The secondary structure of aptamer was obtained by RNAfold web server. The sequence of aptamer was submitted in RNAfold, a web server predicting secondary structures of single stranded corresponding RNA or DNA sequences. RNAfold output the optimal secondary structure in dot-bracket notation with a thermodynamic ensemble free energy. The 3D structure of corresponding RNA was obtained by submitting the secondary structure and sequence on RNA Denovo ([https://new.rosettacommons.org/docs/latest/application\\_documentation/rna/rna-denovo-setup](https://new.rosettacommons.org/docs/latest/application_documentation/rna/rna-denovo-setup)). The RNA Denovo was implemented by Rosetta, which can be carried out reasonably automatically prediction of large RNA 3D structures. Finally, the corresponding RNA 3D structure was converted into DNA 3D structure of aptamer using AMBER16.

### 1.3. Molecular Docking

Molecular docking of DA and aptamer was performed by MOE Dock. 2D structures of molecules were downloaded from PubChem and transformed to 3D structures in MOE by energy minimization, as ligands. Before docking, the force field of AMBER10: EHT and the implicit solvation model of Reaction Field (R-field) was selected. The docking process adopted the flexible “induced fit” mode, and the side chains of the combined pocket bases can be optimized and adjusted according to the ligand conformation, and the weight to constrain the rotation of the side chain was set to 10. Firstly, the binding modes of ligands were first ranked by the London dG scoring function, and the first 30 conformations were further optimized, and the binding free energies were re-evaluated by the GBVI/WSA dG method. The binding mode with the lowest free energy was chosen as the best binding mode. Diagrams of intermolecular binding patterns were completed on PyMOL ([www.pymol.org](http://www.pymol.org)).

### 1.4. Molecular Dynamics (MD) Simulation

After docking, the DA-aptamer complex was optimized by MD simulation. Sodium/chloride counterbalance ions were added to the complex to neutralize the system and solvated in a rectangular water box of TIP3P to form a 10 Å solvent layer between the edge of the water box and the solute surface.

All molecular dynamics simulations were performed by AMBER16 software. AMBER GAFF and FF14SB force fields were applied, and all hydrogen atoms involved in covalent bonds were restricted using the SHAKE algorithm with a time step of 2 fs. The Particle mesh Ewald (PME) method was used to deal with the long-range electrostatic interactions. Two minimization steps were performed for each solvation system before the heating step. The initial 4000 minimization cycles were performed with all heavy atoms confined by 50 kcal/(mol·Å<sup>2</sup>), while solvent molecules and hydrogen atoms were free to move. Unconstrained minimization is then performed, including 2000 steepest descent minimization cycles and 2000 conjugate gradient minimization cycles. The entire system was then heated first from 0 K to 300 K at 100 ps at a constant volume using Langevin dynamics and then equilibrated for 150 ps at a constant pressure of 1 atm. Periodic boundary dynamics simulations were performed for the entire

system, where the NPT (constant components, pressure, and temperature) ensemble was performed at a constant pressure of 1 atm and 300 K during the production step. In the equilibration phase, 100 ns was performed in simulations.

### 1.5. Data analysis of BLI assay

Data analysis of BLI assay was performed by ForteBio Data Analysis 11.0 Software (Sartorius, Shanghai, China). The affinity constant  $K_D$ , association constant  $K_{on}$ , and dissociation constant  $K_{dis}$  were detected to explore the binding affinity of aptamer and target. The constant value was fitted by 1:1 binding model. When  $R^2 > 0.8$  and  $X^2 < 3$ , the data is valid.

## 2. Statistical Analysis

Statistical analysis was performed by Microsoft Excel 16.65 and GraphPad Prism 8.4.3 Software. One way ANOVA was used to analyze the variance and Dunnett's t-test was used to compare the significance between all groups for the various experiments. The probabilities were  $p < 0.05$  (\*),  $p < 0.01$  (\*\*).

## 3. Figures and Tables

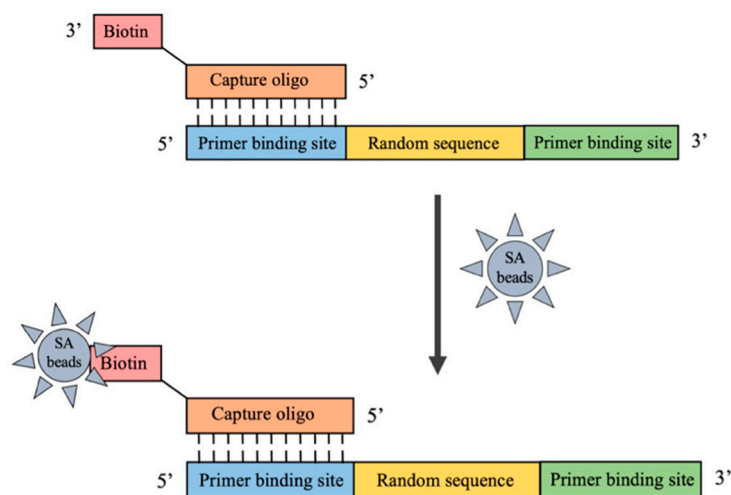

**Figure S1.** Immobilization of the ssDNA library. The ssDNA and capture oligo were hybridized by base pairing, then the hybrid was immobilized on beads through the interaction between streptavidin and biotin.

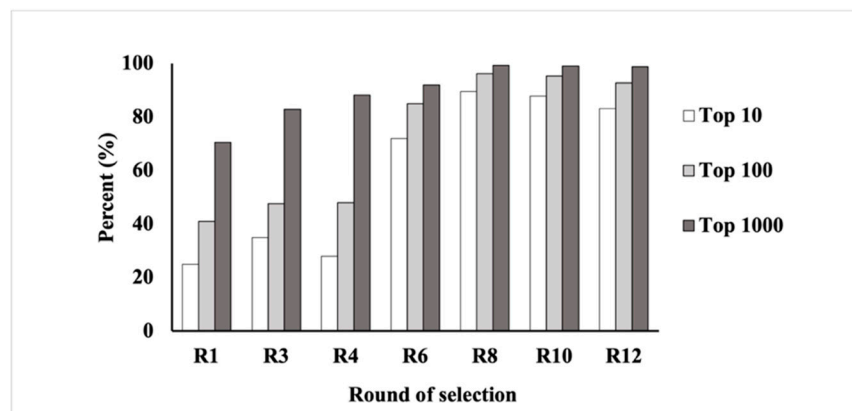

**Figure S2.** The abundance of top 10, top 100, top 1000 sequences in the whole sequencing results of different selection rounds.

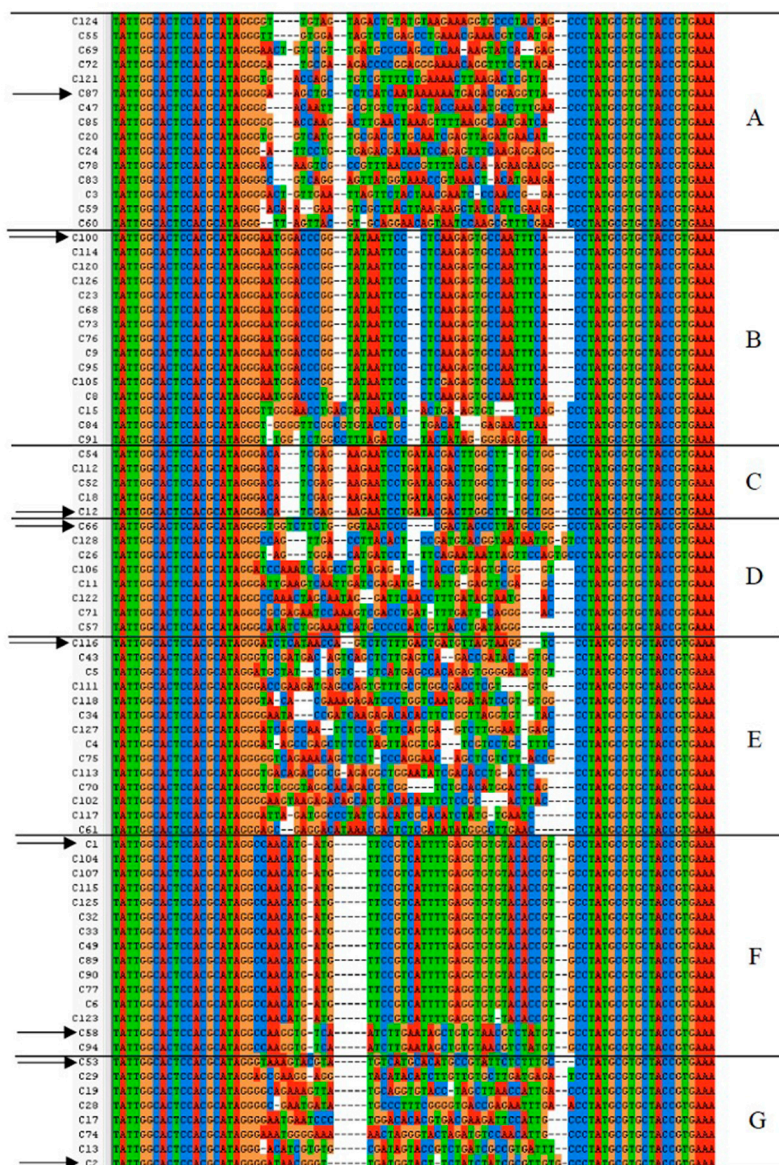

**Figure S3.** Multiple sequence alignment of sequences from cloning sequencing by Clustal X 2.1. These sequences were grouped based on conservation into 7 families (A-G), and a representative sequence was chosen from each group for further analysis (C87, C100, C12, C66, C116, C1, C58, C53 and C2).



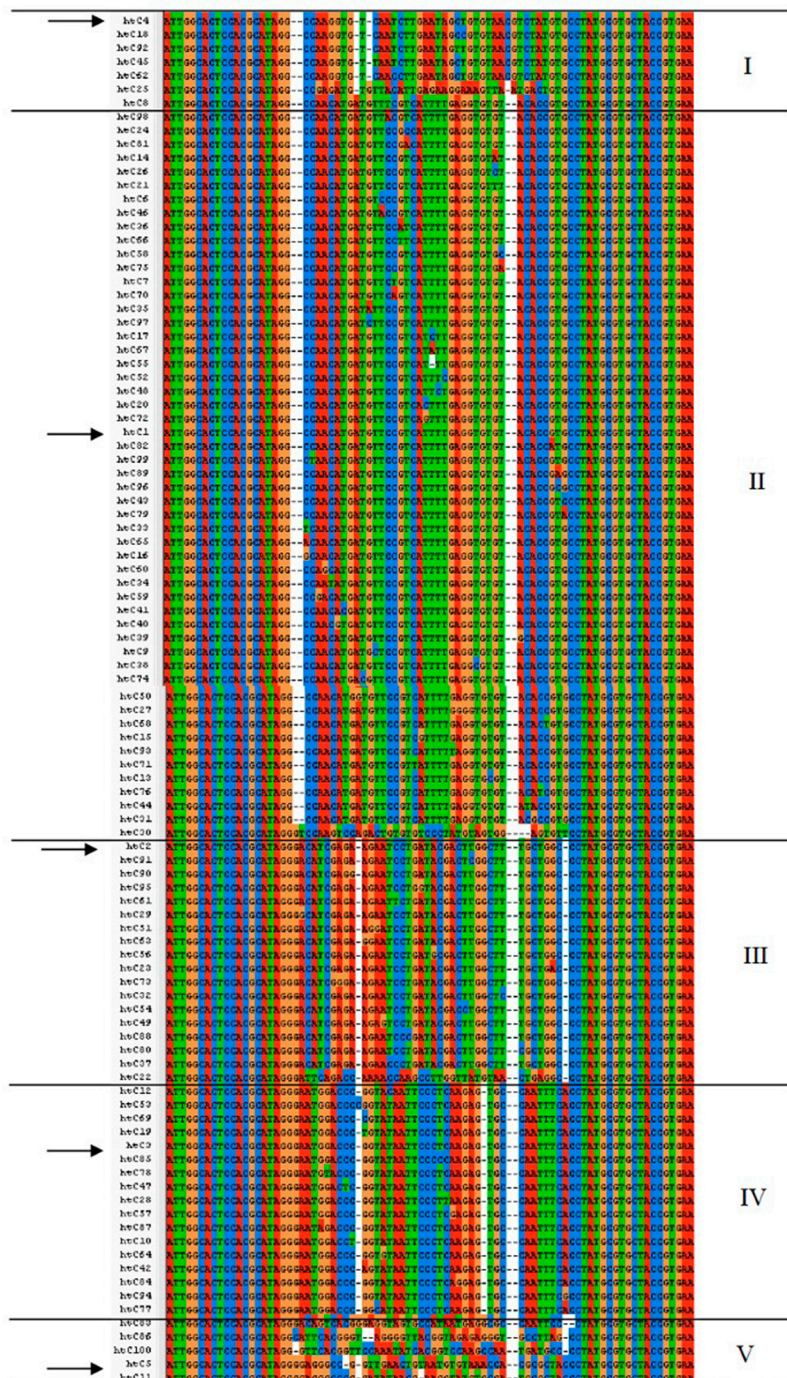

**Figure S4.** Multiple sequence alignment of sequences from high-throughput sequencing (HST) by Clustal X 2.1. These sequences were grouped based on conservation into 5 families (I-V), and a representative sequence was chosen from each group for further analysis (htC1, htC2, htC3, htC4, htC5).

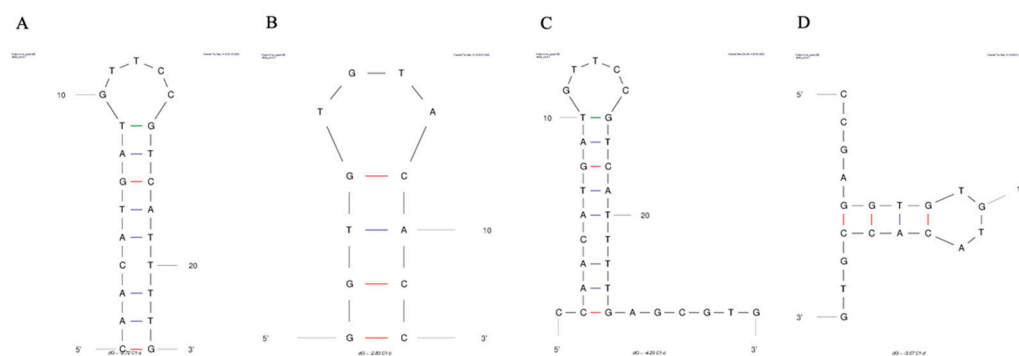

**Figure S5.** Secondary structure prediction of aptamer C1-a (**A**), aptamer C1-b (**B**), aptamer C1-c (**C**), and aptamer C1-d (**D**) with their respective lowest Gibbs free energy value by mfold program. The folding temperature is 25 °C, and the concentrations of  $\text{Na}^+$  and  $\text{Mg}^{2+}$  were 177.7 mM and 0.492 mM, respectively.

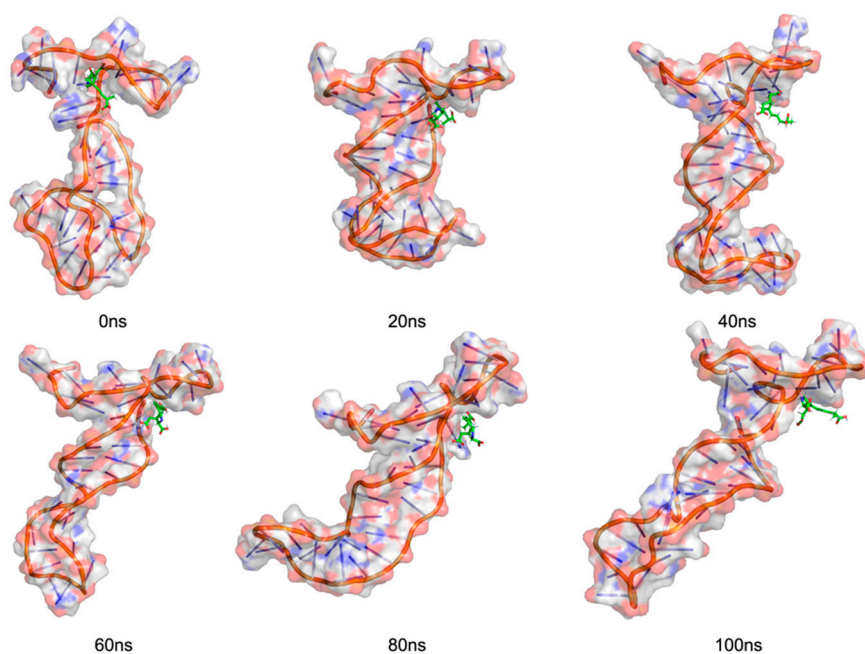

**Figure S6.** The structures at different simulation times of DA with aptamer C1-s. The DA was colored in green. C1-s was colored in red, white, and blue.

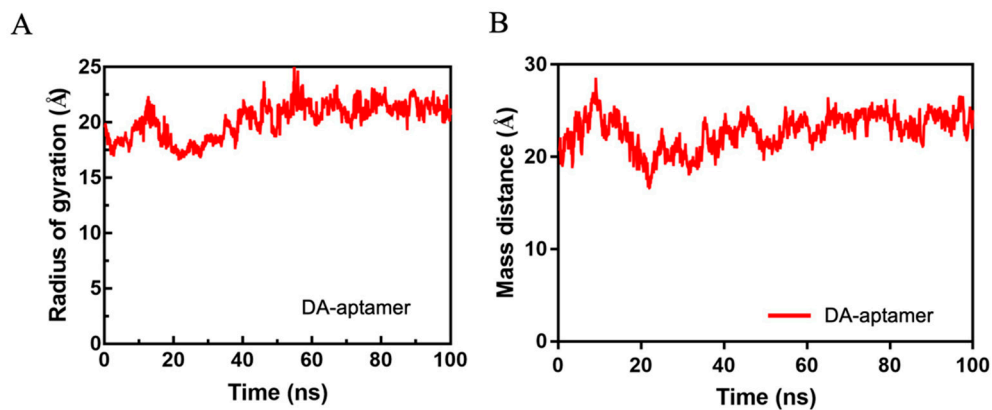

**Figure S7.** (A) Radius of gyration of complex versus simulation time. (B) Mass distance between DA and aptamer versus simulation time.

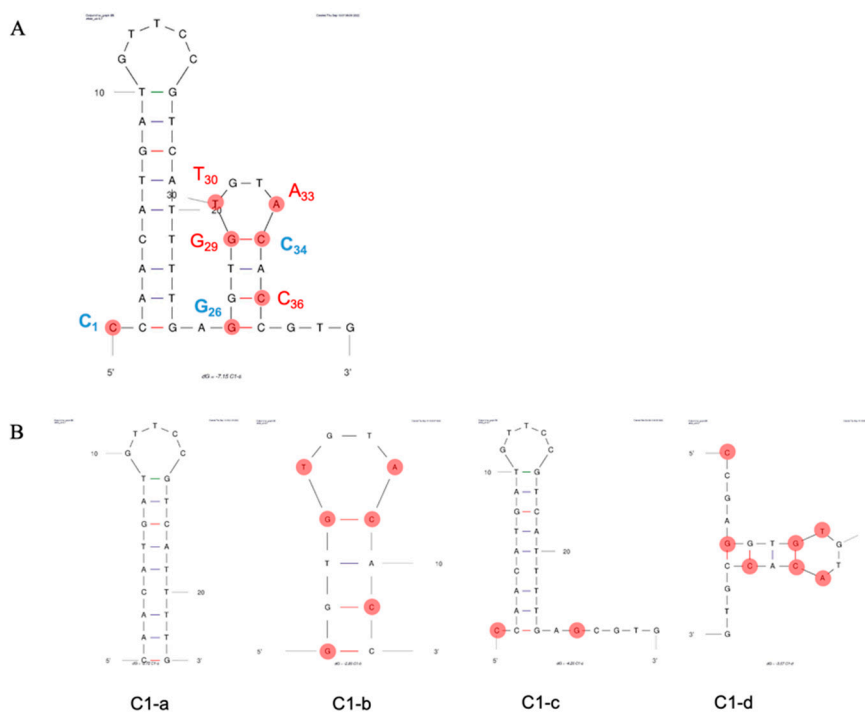

**Figure S8.** The positions of the key bases in the secondary structure of C1-s (A) and the truncated aptamers (B). The bases that contribute most to the complex binding free energy are marked with red circles (C<sub>1</sub>, G<sub>26</sub>, G<sub>29</sub>, T<sub>30</sub>, A<sub>33</sub>, C<sub>34</sub>, and C<sub>36</sub>). And the bases marked in bold blue (C<sub>1</sub>, G<sub>26</sub>, and C<sub>34</sub>) in C1-s can form hydrogen bonds with DA.

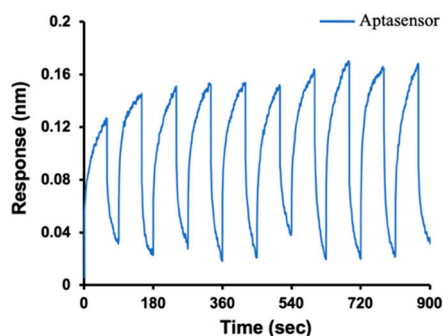

**Figure S9.** Assessment of the reusability of aptasensor for DA detection.

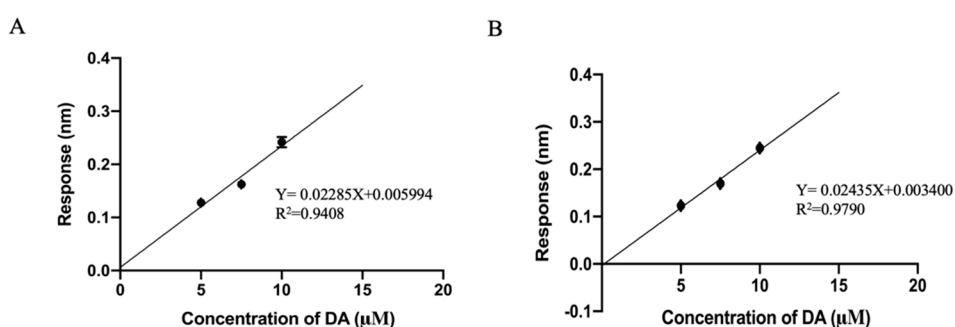

**Figure S10.** Standard curves in seawater (A) and shellfish (B) sample detection.

**Table S1.** Sequences of DNA oligonucleotides.

| Name            | Sequence (5'–3')                                                                      |
|-----------------|---------------------------------------------------------------------------------------|
| F1              | ATTGGCACTCCACGCATAGG                                                                  |
| R1              | A <sub>20</sub> -Spacer18-TTCACGGTAGCACGCATAGG                                        |
| R2              | TTCACGGTAGCACGCATAGG                                                                  |
| Capture oligo   | CCTATGCGTGGAGTGCCAAT-biotin                                                           |
| Library         | ATTGGCACTCCACGCATAGG-N (40)-CCTATGCGTGCTACCGTGAA                                      |
| Random Sequence | ATTGGCACTCCACGCATAGGATTCCGGCTAATCGACTGACTGCCGGTACG<br>ATGCAGTCAG CCTATGCGTGCTACCGTGAA |
| T1              | <u>AAAGCA</u> ATTGGCACTCCACGCATAGG                                                    |
| T2              | <u>AACGCC</u> ATTGGCACTCCACGCATAGG                                                    |
| T3              | <u>AAGGCG</u> ATTGGCACTCCACGCATAGG                                                    |
| T4              | <u>AATGCT</u> ATTGGCACTCCACGCATAGG                                                    |
| T5              | <u>ACCGGC</u> ATTGGCACTCCACGCATAGG                                                    |
| T6              | <u>ACTGGT</u> ATTGGCACTCCACGCATAGG                                                    |
| T7              | <u>AGCGTC</u> ATTGGCACTCCACGCATAGG                                                    |
| C1-s            | CCAACATGATGTTCCGTCATTTTGAGGTGTGTACACCGTG                                              |
| C1-a            | CAACATGATGTTCCGTCATTTTG                                                               |
| C1-b            | GGTGTGTACACC                                                                          |
| C1-c            | CCAACATGATGTTCCGTCATTTTGAGCGTG                                                        |
| C1-d            | CCGAGGTGTGTACACCGTG                                                                   |



**Table S2.** SELEX conditions for isolating aptamers toward DA.

| Round | Amount of library (pmol) | Amount of DA (pmol) | Amount of KA (pmol) | Incubation time of DA (min) | Incubation time of KA (min) |
|-------|--------------------------|---------------------|---------------------|-----------------------------|-----------------------------|
| 1     | 2000                     | 100                 | 0                   | 60                          | 0                           |
| 2     | 300                      | 100                 | 0                   | 60                          | 0                           |
| 3     | 300                      | 100                 | 0                   | 60                          | 0                           |
| 4     | 100                      | 100                 | 0                   | 60                          | 0                           |
| 5     | 100                      | 100                 | 0                   | 60                          | 0                           |
| 6     | 100                      | 100                 | 100                 | 60                          | 30                          |
| 7     | 100                      | 100                 | 100                 | 60                          | 30                          |
| 8     | 100                      | 100                 | 100                 | 45                          | 50                          |
| 9     | 100                      | 100                 | 100                 | 45                          | 50                          |
| 10    | 100                      | 100                 | 150                 | 45                          | 50                          |
| 11    | 100                      | 100                 | 150                 | 45                          | 70                          |
| 12    | 100                      | 100                 | 150                 | 45                          | 70                          |

**Table S3.** The affinity of the truncated aptamers.

| Name | Response (nm) | $K_D$ (M)             | $K_D$ Error           | $R_2$  | $X_2$  |
|------|---------------|-----------------------|-----------------------|--------|--------|
| C1-s | 0.1585        | $1.50 \times 10^{-6}$ | $1.13 \times 10^{-7}$ | 0.9368 | 0.0457 |
| C1-a | 0.1267        | $6.90 \times 10^{-6}$ | $6.28 \times 10^{-7}$ | 0.7933 | 0.2485 |
| C1-b | 0.1522        | $1.67 \times 10^{-7}$ | $9.33 \times 10^{-9}$ | 0.9455 | 0.0450 |
| C1-c | 0.1290        | $4.90 \times 10^{-6}$ | $3.12 \times 10^{-7}$ | 0.8013 | 0.0819 |
| C1-d | 0.1701        | $1.09 \times 10^{-7}$ | $9.31 \times 10^{-9}$ | 0.9469 | 0.0311 |

**Table S4.** Average Binding Energy and its Components Obtained from the MM-GBSA Calculation for the DA-aptamer.

| Contribution          | Energy (kcal/mol) |
|-----------------------|-------------------|
| $\Delta E_{vdw}$      | -24.0262±0.21     |
| $\Delta E_{ele}$      | -44.0991±0.68     |
| $\Delta G_{polar}$    | 57.7329±0.58      |
| $\Delta G_{nonpolar}$ | -3.1129±0.02      |
| $\Delta G_{total}$    | -13.5053±0.19     |

**Table S5.** Energy decomposition.

| Base | $\Delta E_{vdw}$ | $\Delta E_{ele}$ | $\Delta G_{sol}$ | $\Delta G_{total}$ |
|------|------------------|------------------|------------------|--------------------|
| G29  | -3.0546          | 0.676885         | 0.067766         | -2.30995           |
| C1   | -1.72406         | -1.49513         | 2.133066         | -1.08612           |
| C34  | -2.37374         | -1.80076         | 3.135828         | -1.03868           |
| G26  | -1.32287         | -12.0155         | 12.45581         | -0.88258           |
| C36  | -0.34203         | -1.99945         | 2.024968         | -0.31651           |
| A33  | -0.26956         | -0.64659         | 0.909442         | -0.00671           |
| T30  | -0.28887         | -0.06438         | 0.351863         | -0.00138           |

**Table S6.** The response values of blank samples.

| NO. | Response (nm) | NO. | Response (nm) |
|-----|---------------|-----|---------------|
| 1   | 0.0004        | 11  | 0.0006        |
| 2   | 0.0006        | 12  | 0.0006        |
| 3   | 0.0005        | 13  | 0.0005        |
| 4   | 0.0005        | 14  | 0.0007        |
| 5   | 0.0006        | 15  | 0.0004        |
| 6   | 0.0005        | 16  | 0.0005        |
| 7   | 0.0005        | 17  | 0.0005        |
| 8   | 0.0006        | 18  | 0.0006        |
| 9   | 0.0004        | 19  | 0.0004        |
| 10  | 0.0007        | 20  | 0.0004        |

**Table S7.** Detection of DA concentrations around (or below) the theoretical LOQ.

| Conc. (nM) | Response (nm) | R <sup>2</sup> | X <sup>2</sup> | Mean±SD            | Theoretical value (nm) |
|------------|---------------|----------------|----------------|--------------------|------------------------|
| 50         | 0.01282       | 0.86           | 0.1069         | 0.01294±0.00042712 | 0.0128                 |
|            | 0.01341       | 0.8075         | 0.1291         |                    |                        |
|            | 0.01258       | 0.7968         | 0.0927         |                    |                        |
| 37.5       | 0.01250       | 0.7884         | 0.2273         | 0.01264±0.00014526 | 0.01271                |
|            | 0.01263       | 0.8023         | 0.1470         |                    |                        |
|            | 0.01279       | 0.791          | 0.3523         |                    |                        |
| 25         | 0.01069       | 0.813          | 0.0591         | 0.01164±0.0086435  | 0.01245                |
|            | 0.01238       | 0.7792         | 0.1038         |                    |                        |
|            | 0.01185       | 0.8387         | 0.0294         |                    |                        |
